# Supplementary material for: Binuclear heterometallic M(iii)–Mn(ii) (M = Fe, Cr) oxalate-bridged complexes associated with a bisamidinium dication: a structural and magnetic study
Source: Royal Society of Chemistry journal article supplement (doi:10.1039/c0nj00976h), 2011-01-01
Supplement: c0nj00976h.pdf [file c0nj00976h.pdf]

# Binuclear heterometallic M(III)–Mn(II) (M = Fe, Cr) oxalate-bridged complexes associated with a bisamidinium dication: a structural and magnetic study

Catalin Maxim,<sup>a,b</sup> Sylvie Ferlay<sup>a,c,\*</sup> and Cyrille Train<sup>d,e,\*</sup>

<sup>a</sup> Laboratoire de Chimie de Coordination Organique, UMR CNRS-UdS 7140, Université de Strasbourg, Institut Le Bel, 4, rue Blaise Pascal, F-67000 Strasbourg, France

<sup>b</sup> University of Bucharest, Faculty of Chemistry, Inorganic Chemistry Laboratory, Str. Dumbrava Rosie nr. 23, 020464-Bucharest, Romania.

<sup>c</sup> Institut Universitaire de France (IUF)

<sup>d</sup> Laboratoire National des Champs Magnétiques Intenses, UPR CNRS 3228, 25 rue des Martyrs, B.P. 166, 38042 Grenoble cedex 9, France

<sup>e</sup> Université Joseph Fourier, BP 53, F-38041 Grenoble Cedex 9, France

## PXRD characterization for compounds 1-2

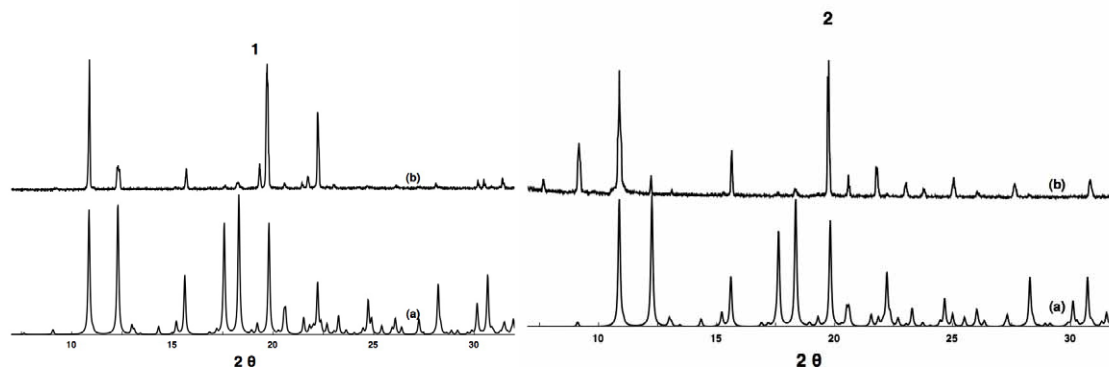

Figure S1 : Comparison of the simulated (a) and recorded (b) PXRD patterns for **1** (left) and **2** (right).

## Thermal properties

Thermal analysis of the polycrystalline compounds reveals that **1** and **2** are stable up to 250 and 350°C respectively. The first weight loss of 19.6% for **1** (19.3% for **2**) between 30-147°C corresponds to the removal of 14 water molecules (calc.: 19.35%, 19.46% for **1** and **2** respectively); the analysis of the derivate of the curves in this area reveals, as expected by the different nature of the water molecules (6 lattice water molecules, 8 molecules as aqua ligands) a two steps loss process. At high temperature (250°C), **1** presents a decomposition process different from the one of **2**, related to the early decomposition of Fe(III) into oxydes.

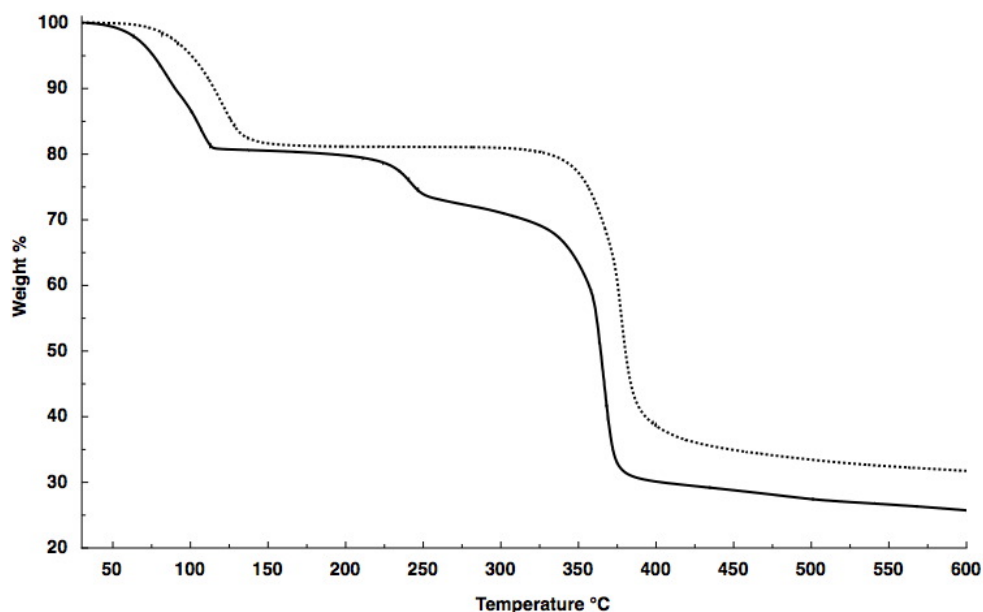

Figure S2 : TGA trace for **1** (—) and **2** (.....)

**Table 2. Selected bond distances and angles for compounds 1 and 2.**

| <b>1</b>       |            | <b>2</b>       |            |
|----------------|------------|----------------|------------|
| Fe-O(13)       | 1.9835(12) | Cr-O(13)       | 1.958(3)   |
| Fe-O(1)        | 2.0072(12) | Cr-O(12)       | 1.972(3)   |
| Fe-O(10)       | 2.0079(12) | Cr-O(1)        | 1.976(3)   |
| Fe-O(12)       | 2.0114(12) | Cr-O(11)       | 1.981(3)   |
| Fe-O(11)       | 2.0175(13) | Cr-O(10)       | 1.983(3)   |
| Fe-O(2)        | 2.0314(12) | Cr-O(2)        | 1.989(3)   |
| Mn-O(6)        | 2.1329(14) | Mn-O(6)        | 2.131(3)   |
| Mn-O(7)        | 2.1416(13) | Mn-O(7)        | 2.147(3)   |
| Mn-O(5)        | 2.1546(14) | Mn-O(5)        | 2.153(3)   |
| Mn-O(8)        | 2.1660(14) | Mn-O(8)        | 2.167(3)   |
| Mn-O(4)        | 2.2149(12) | Mn-O(4)        | 2.222(3)   |
| Mn-O(3)        | 2.2425(13) | Mn-O(3)        | 2.239(3)   |
| O(13)-Fe-O(1)  | 95.16(5)   | O(13)-Cr-O(12) | 82.90(12)  |
| O(13)-Fe-O(10) | 168.74(6)  | O(13)-Cr-O(1)  | 91.11(13)  |
| O(1)-Fe-O(10)  | 93.77(5)   | O(12)-Cr-O(1)  | 92.63(13)  |
| O(13)-Fe-O(12) | 81.10(5)   | O(13)-Cr-O(11) | 93.32(13)  |
| O(1)-Fe-O(12)  | 92.63(5)   | O(12)-Cr-O(11) | 93.63(14)  |
| O(10)-Fe-O(12) | 91.67(5)   | O(1)-Cr-O(11)  | 172.74(12) |
| O(13)-Fe-O(11) | 92.24(5)   | O(13)-Cr-O(10) | 173.48(14) |
| O(1)-Fe-O(11)  | 168.16(5)  | O(12)-Cr-O(10) | 92.96(13)  |
| O(10)-Fe-O(11) | 80.12(5)   | O(1)-Cr-O(10)  | 94.12(13)  |
| O(12)-Fe-O(11) | 97.64(6)   | O(11)-Cr-O(10) | 81.89(13)  |
| O(13)-Fe-O(2)  | 91.82(5)   | O(13)-Cr-O(2)  | 92.01(12)  |
| O(1)-Fe-O(2)   | 80.97(5)   | O(12)-Cr-O(2)  | 173.09(12) |
| O(10)-Fe-O(2)  | 96.35(5)   | O(1)-Cr-O(2)   | 82.77(13)  |
| O(12)-Fe-O(2)  | 170.03(5)  | O(11)-Cr-O(2)  | 91.32(12)  |
| O(11)-Fe-O(2)  | 89.59(5)   | O(10)-Cr-O(2)  | 92.52(13)  |
| O(6)-Mn-O(7)   | 88.42(6)   | O(6)-Mn-O(7)   | 88.27(13)  |
| O(6)-Mn-O(5)   | 96.84(6)   | O(6)-Mn-O(5)   | 97.09(15)  |
| O(7)-Mn-O(5)   | 91.17(5)   | O(7)-Mn-O(5)   | 91.20(12)  |
| O(6)-Mn-O(8)   | 93.71(6)   | O(6)-Mn-O(8)   | 93.19(14)  |
| O(7)-Mn-O(8)   | 177.49(6)  | O(7)-Mn-O(8)   | 177.74(14) |

|              |           |              |            |
|--------------|-----------|--------------|------------|
| O(5)-Mn-O(8) | 89.89(6)  | O(5)-Mn-O(8) | 90.33(14)  |
| O(6)-Mn-O(4) | 167.15(6) | O(6)-Mn-O(4) | 167.12(13) |
| O(7)-Mn-O(4) | 89.75(5)  | O(7)-Mn-O(4) | 90.37(12)  |
| O(5)-Mn-O(4) | 95.91(5)  | O(5)-Mn-O(4) | 95.75(12)  |
| O(8)-Mn-O(4) | 87.88(5)  | O(8)-Mn-O(4) | 87.82(12)  |
| O(6)-Mn-O(3) | 91.83(6)  | O(6)-Mn-O(3) | 91.77(13)  |
| O(7)-Mn-O(3) | 88.41(5)  | O(7)-Mn-O(3) | 88.03(12)  |
| O(5)-Mn-O(3) | 171.31(5) | O(5)-Mn-O(3) | 171.08(13) |
| O(8)-Mn-O(3) | 90.20(6)  | O(8)-Mn-O(3) | 90.20(14)  |
| O(4)-Mn-O(3) | 75.41(5)  | O(4)-Mn-O(3) | 75.38(11)  |
